# Supplementary material
Source: PubMed Central journal article supplement (PMC3090611)
Supplement: NIHMS275551-supplement-2.pdf [file NIHMS275551-supplement-2.pdf]

# Supplementary Data

## Shank3 mutant mice display autistic-like behaviours and striatal dysfunction

João Peça, Cátia Feliciano, Jonathan T. Ting, Wenting Wang, Michael F. Wells, Talaignair N. Venkatraman, Christopher D. Lascola, Zhanyan Fu and Guoping Feng

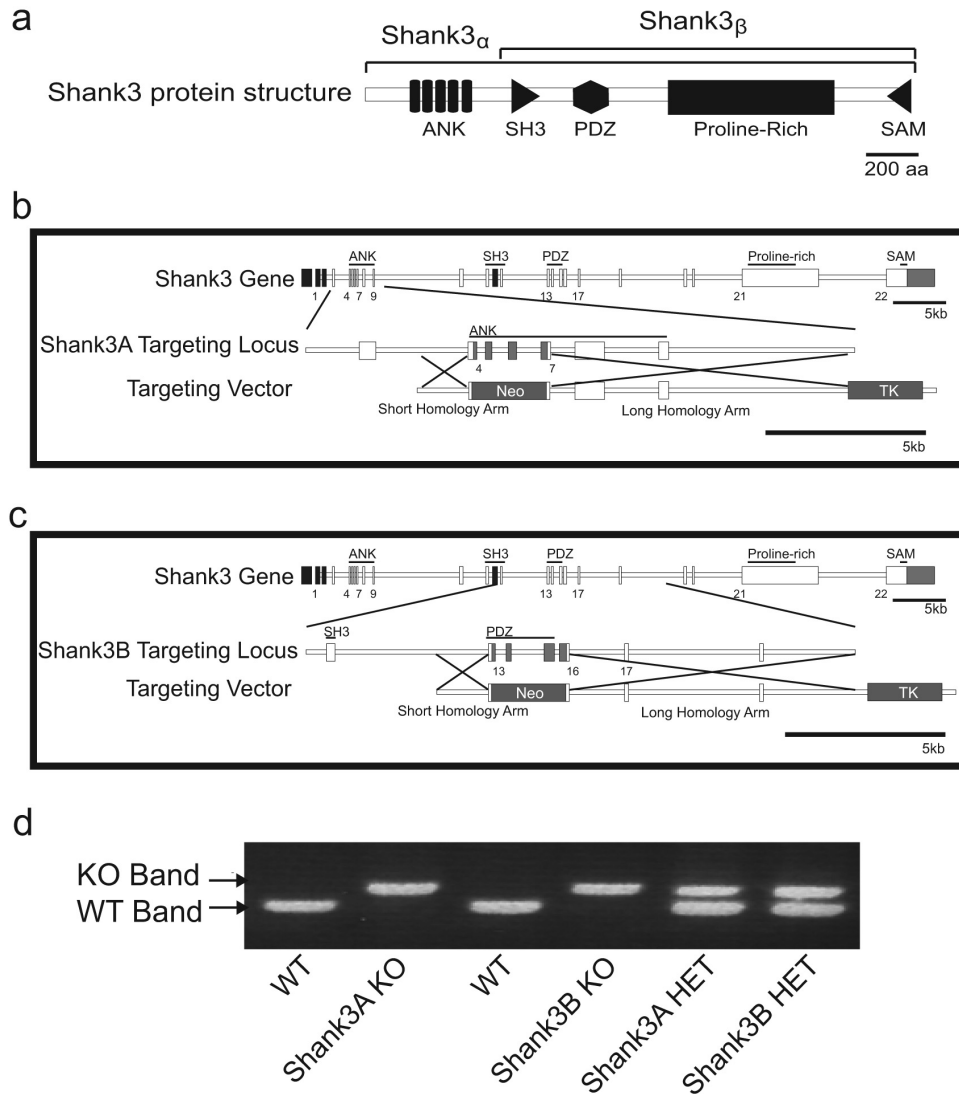

**Supplementary Figure 1 | Shank3 protein structure, gene structure and targeted disruptions.** **a**, Shank3 protein structure, with known isoforms highlighted. **b**, **c**, Targeting strategy and targeting vector for Shank3A-mutant mice (**b**), and Shank3B-mutant mice (**c**). **d**, PCR genotyping for Shank3A<sup>+/+</sup>, Shank3A<sup>+/-</sup>, Shank3A<sup>-/-</sup>, Shank3B<sup>+/+</sup>, Shank3B<sup>+/-</sup> and Shank3B<sup>-/-</sup> mice.

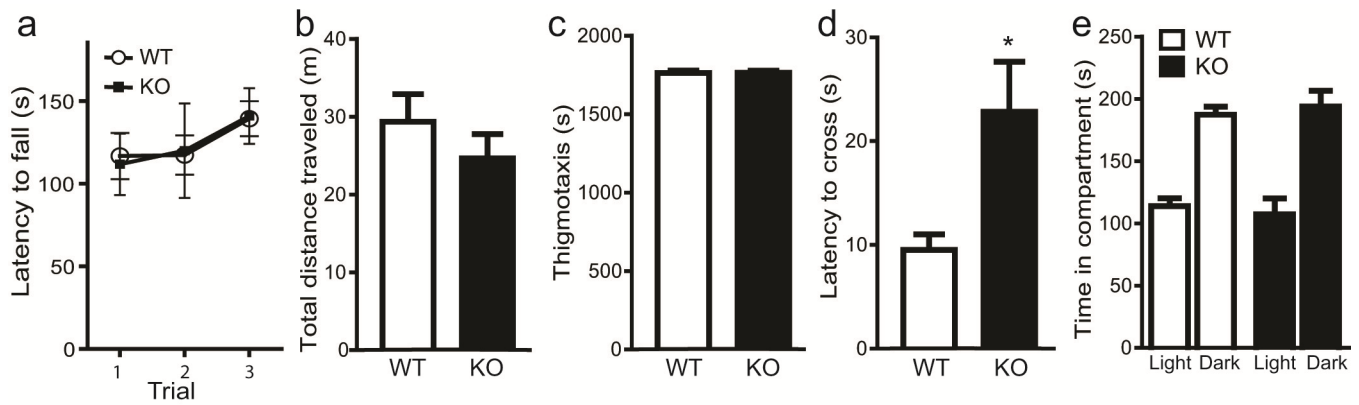

**Supplementary Figure 2 | Motor learning and anxiety tests in *Shank3B*<sup>-/-</sup> mice.** **a**, In the rotarod test, *Shank3B*<sup>-/-</sup> mice and controls display similar levels of motor coordination. **b**, **c**, In the open field test, *Shank3B*<sup>-/-</sup> mice, when compared to controls, display similar levels of total distance traveled (**b**) and thigmotaxis (**c**). **d**, **e**, In the dark-light box emergence test, *Shank3B*<sup>-/-</sup> mice display an increased latency to initially cross from the dark into the brightly lit chamber (**d**), but spend a similar amount of time in either chamber when compared to controls (**e**). \*  $p < 0.05$ , two-tailed  $t$ -test for **d**; all data are presented as means  $\pm$  s.e.m;  $n = 5$  mice per genotype for **a**, and 8-9 mice per genotype for **b-e**.

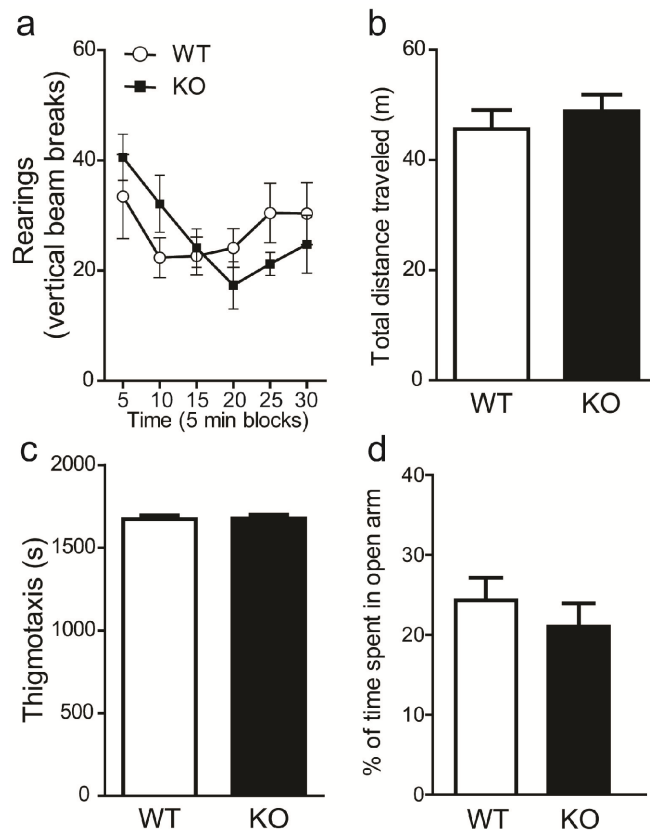

**Supplementary Figure 3 | Anxiety levels and exploratory behaviours in *Shank3A*<sup>-/-</sup> mice.** **a-c**, In the open field test *Shank3A*<sup>-/-</sup> rearing (**a**), total distance traveled (**b**), and time spent close to the chamber walls (thigmotaxis) (**c**) is not significantly different from controls. **d**, In the zero maze test, *Shank3A*<sup>-/-</sup> mice spent a similar amount of time in the open area when compared to wildtype controls. Two-tailed  $t$ -test for **b-d**; Two-way repeated measures ANOVA for **a**; all data presented as means  $\pm$  s.e.m.  $n = 8$  mice per genotype.

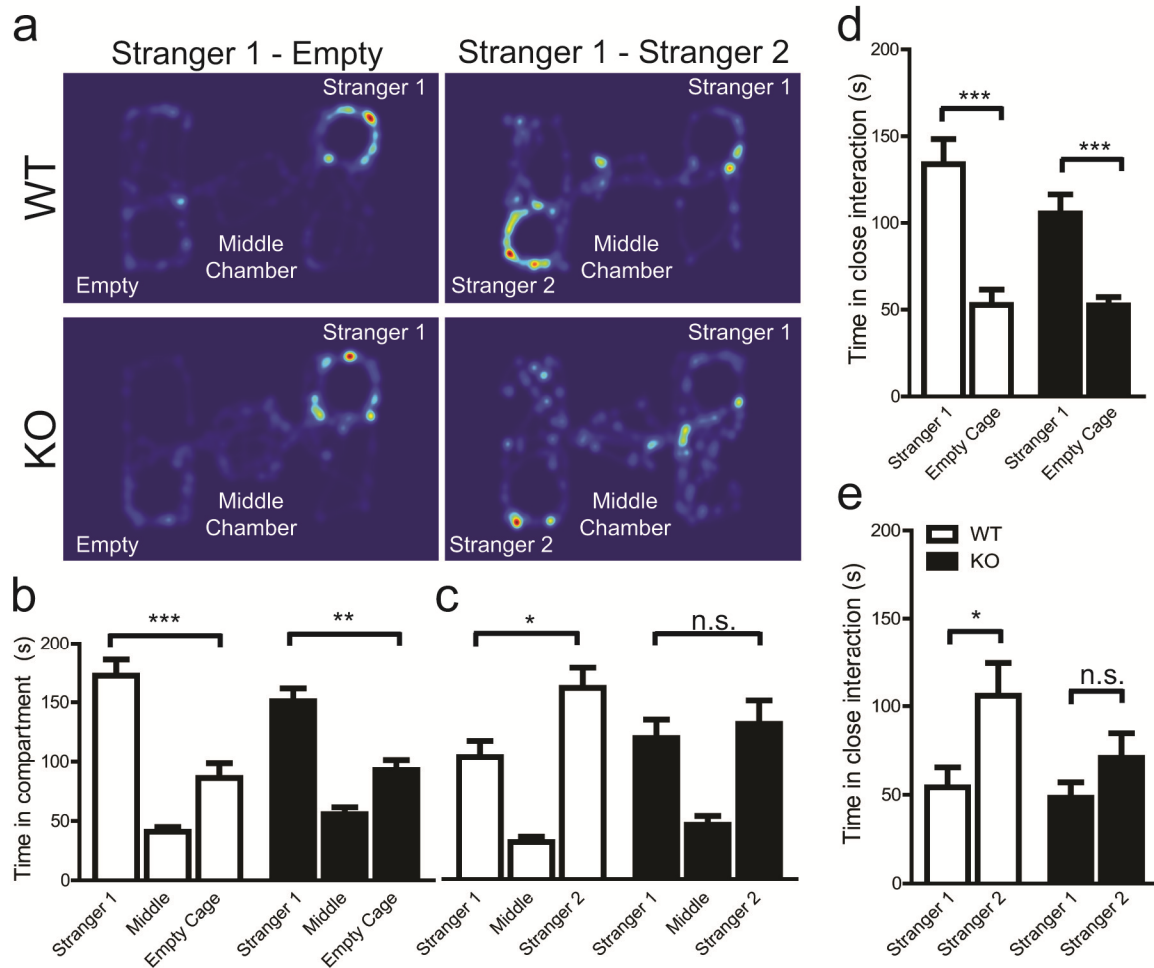

**Supplementary Figure 4 | Social interaction and social novelty recognition tests in *Shank3A*<sup>-/-</sup> mice.** **a**, Representative heat map analysis from “Stranger 1 – Empty” and “Stranger 1 – Stranger 2” trials from *Shank3A*<sup>-/-</sup> mice and controls. **b**, In the social interaction test, both *Shank3A*<sup>-/-</sup> mice (KO – black bars) and wildtype controls (WT – white bars) spent more time in the chamber containing the social partner (Stranger 1) than in the chamber containing the empty wire cage (Empty Cage). **c**, In the social novelty test, *Shank3A*<sup>-/-</sup> mice do not display preference for the novel social partner (Stranger 2). **d**, **e**, When analyzing social interaction by close proximity (within 5cm) to either “Stranger 1”, “Empty Cage” (**d**), or “Stranger 1”, “Stranger 2” (**e**), *Shank3A*<sup>-/-</sup> mice again display a preference for close social interaction with “Stranger 1” than “Empty cage” (**d**); however, under a social novelty paradigm (**e**), *Shank3A* mutants display abnormal social novelty recognition, as indicated by reduced preference for the novel social partner (Stranger 2). \* p<0.05, \*\* p<0.01, \*\*\* p<0.0001, One-way ANOVA, with Bonferroni *post hoc t*-test; data are presented as means ± s.e.m. from 12-13 mice per group.

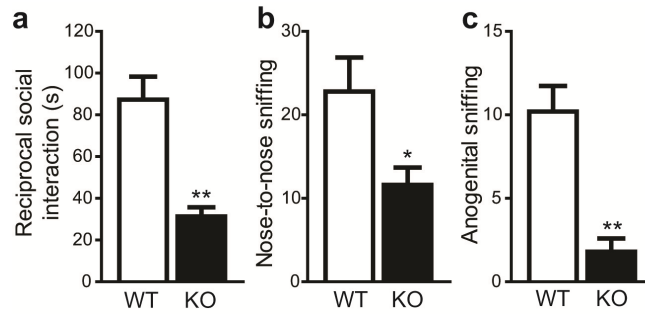

**Supplementary Figure 5 | *Shank3B*<sup>-/-</sup> mice display social deficits during dyadic interaction in an open arena test.** **a**, Unfamiliar pairs of wildtype-*Shank3B*<sup>-/-</sup> mice (black bars) spend less time in reciprocal social interaction when compared to unfamiliar pairs of wildtype-wildtype mice (white bars). **b**, **c**, Quantification of nose-to-nose sniffing (**b**) and anogenital sniffing (**c**) by the target animal (wildtype or *Shank3B*<sup>-/-</sup>) towards a stimulus animal (wildtype) demonstrates that the *Shank3B*<sup>-/-</sup> mice (black bars) display a reduction in the frequency of social exploratory events when compared to wildtype controls (white bars). \*  $p < 0.05$ , \*\*  $p < 0.01$ , two-tailed *t*-test; all data presented as means  $\pm$  s.e.m.;  $n = 5$  mice per group.

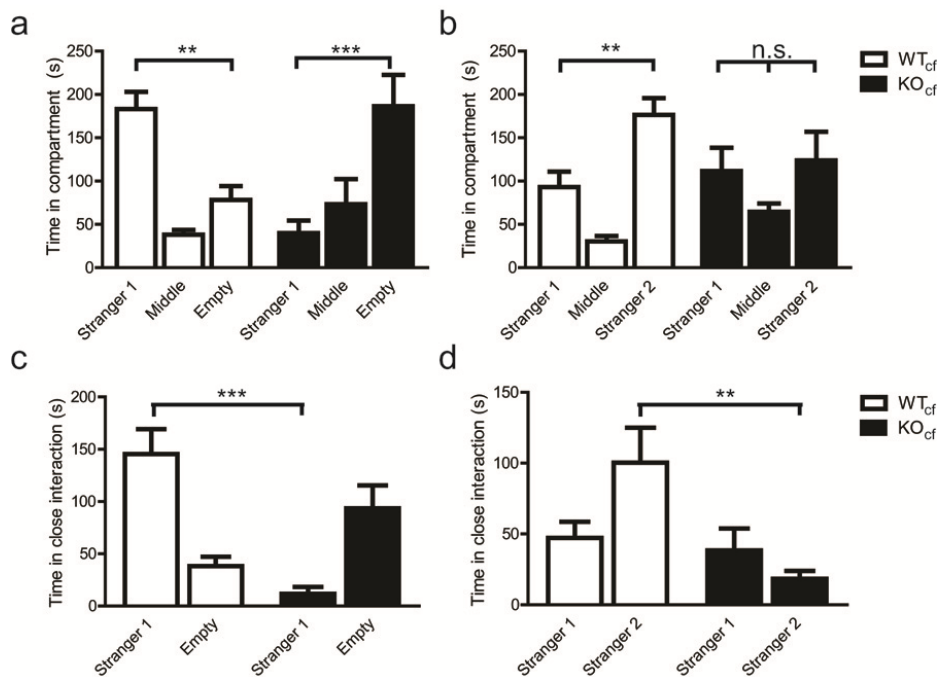

**Supplementary Figure 6 | Cross-fostering of *Shank3B* mutants and wildtype mice does not rescue the sociability phenotype in *Shank3B*<sup>-/-</sup> mice and does not impact social interaction and social recognition in wildtype mice.** Wildtype and *Shank3B*<sup>-/-</sup> neonatal pups from homozygous x homozygous mating were cross-fostered at postnatal day 1 and reared by dams of the opposite genotype (wildtype mice with *Shank3B*<sup>-/-</sup> dams “WT<sub>cf</sub>” and *Shank3B*<sup>-/-</sup> mice with wildtype dams “KO<sub>cf</sub>”). **a**, In the three-chamber social interaction test, cross-fostered *Shank3B*<sup>-/-</sup> mice (KO<sub>cf</sub> – black bars) spent less time in the chamber containing the social partner (Stranger 1) and more time in the chamber containing the empty wire cage (Empty Cage), cross-fostered wildtype mice display normal sociability levels (WT<sub>cf</sub> – white bars). **b**, In the social novelty test, cross-fostered *Shank3B*<sup>-/-</sup> mice do not display a preference for the novel social partner (Stranger 2). **c**, **d**, When analyzing social interaction by close proximity (within 5cm) to either “Stranger 1”, “Empty Cage” (**c**), or “Stranger 1”, “Stranger 2” (**d**), cross-fostered *Shank3B*<sup>-/-</sup> mice displayed a clear reduction in social interaction (**c**); while under a social novelty paradigm (**d**), cross-fostered *Shank3B*<sup>-/-</sup> mice displayed a clear reduction in time spent with “Stranger 2”. \*\*  $p < 0.01$ , \*\*\*  $p < 0.001$ , One-Way ANOVA, with Bonferroni *post hoc*-test; all data are presented as means  $\pm$  s.e.m. from 7 mice per group.

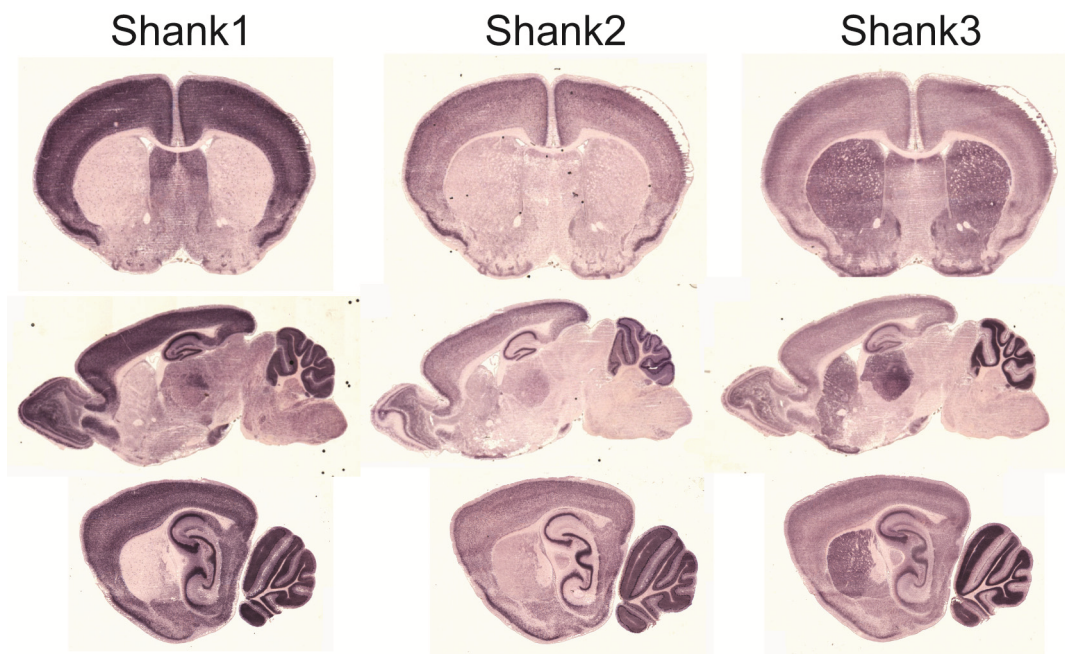

Table 1

Expression of Shank family of proteins in the CNS

|                        | Shank1 | Shank2 | Shank3 |
|------------------------|--------|--------|--------|
| Cortex                 | +++++  | +++    | +++    |
| Thalamus               | +++    | +      | +++++  |
| Striatum               | -      | -      | +++++  |
| Amygdala               | +++    | +      | +      |
| Hippocampus            | +++++  | +++    | +++    |
| CA1                    | +++++  | +++    | ++     |
| CA3                    | ++++   | +++    | ++++   |
| Dentate Gyrus          | +++    | +++    | +      |
| Cerebellum             | +++    | +++    | +++    |
| Purkinje cells         | ++++   | +++++  | -      |
| Granule cells          | ++     | -      | ++++   |
| Colliculus             | ++     | -      | +      |
| Brain Stem             | ++     | -      | +      |
| Dendritically targeted | Yes    | No     | Yes    |

**Supplementary Figure 7 | mRNA *in situ* characterization of *Shank* family of genes.** a, *Shank1*, *Shank2* and *Shank3* mRNA *in situ* hybridization of coronal, medial parasagittal and lateral parasagittal mouse brain section from 5 week old mice. *Shank3* is the only Shank family member highly expressed in the striatum.

**Supplementary Table 1 | Expression of *Shank* family of proteins in the CNS.** Relative expression levels of *Shank1*, *Shank2* and *Shank3* in different areas of the central nervous system in serial sections from 5 week old mice (+++++ highest expression; - no detectable expression).

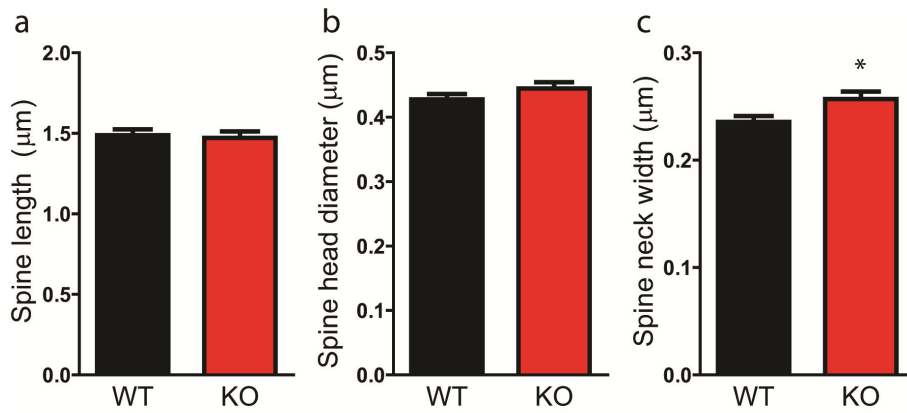

**Supplementary Figure 8 | Morphological spine metrics from *Shank3B*<sup>-/-</sup> and control MSNs.** a-c, Spine length and spine head diameter are not significantly different between *Shank3B*<sup>-/-</sup> and wildtype medium spiny neurons (a, b), whereas spine neck width is larger in *Shank3B*<sup>-/-</sup> spines (c). \* p<0.05, two-tailed *t*-test; all data are presented as means ± s.e.m; n = 140 spines per genotype.

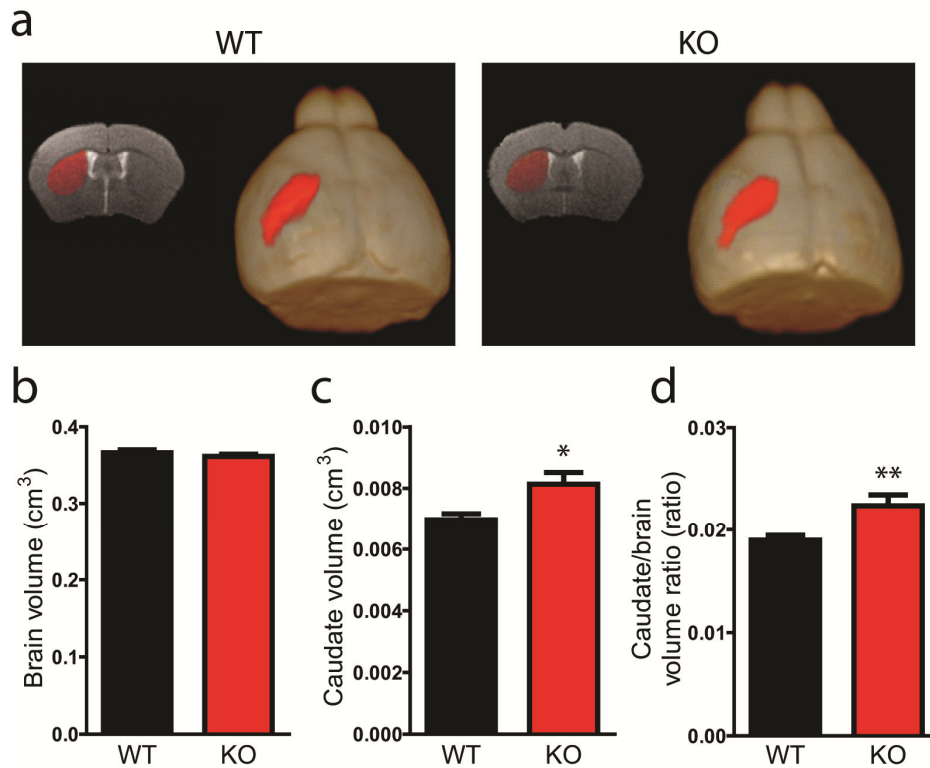

**Supplementary Figure 9 | Increased striatal volume in *Shank3B*<sup>-/-</sup> mice.** a-c, Striatum and whole brain volumes measured by MRI. a, A 3D reconstruction of the brain is used for striatal and whole brain volumetric analysis as depicted for both WT and KO. b, Whole brain volume is not significantly different between control (WT) and *Shank3B*<sup>-/-</sup> mice (KO). c, Striatal volume is significantly larger in the *Shank3B*<sup>-/-</sup> mice. d, Striatum/brain volume ratio is increased in the *Shank3B*<sup>-/-</sup> mice. \* p<0.05, \*\* p<0.01, two-tailed *t*-test. Data are presented as means ± s.e.m, n = 12 mice per genotype.

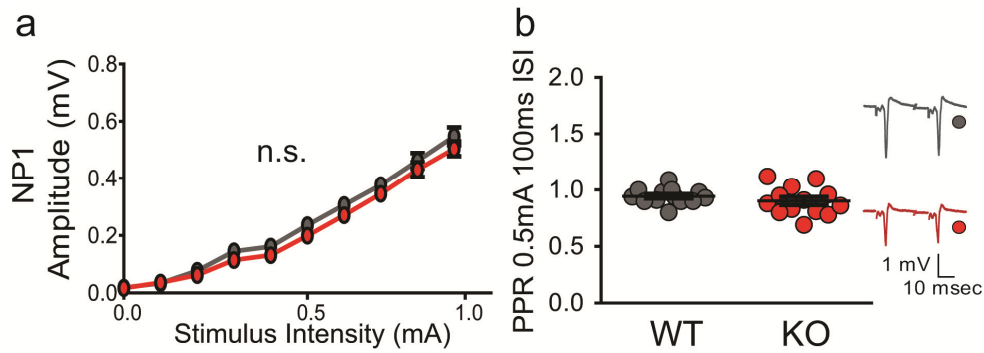

**Supplementary Figure 10 | Normal presynaptic function in *Shank3B*<sup>-/-</sup> mice.** Presynaptic function was measured by the relationship of stimulation intensity to the amplitude of the action potential component of the response termed negative peak 1 (NP1, **a**), and the paired-pulse ratios (PPR, **b**). NP1 amplitude (**a**) and PPR (**b**) are not significantly different between *Shank3B*<sup>-/-</sup> and control mice; example traces are shown as an inset for *Shank3B*<sup>-/-</sup> mice (red) and wildtype (grey). All data are presented as means  $\pm$  s.e.m; n=13 slices from 4 mice per group.

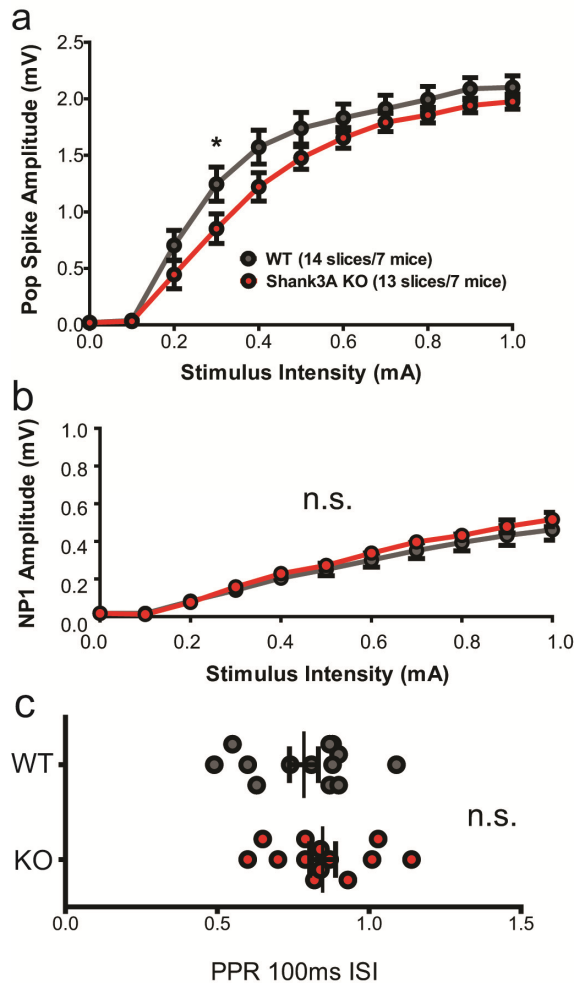

**Supplementary Figure 11 | Slight reduction in cortico-striatal synaptic transmission in *Shank3A*<sup>-/-</sup> mice.** **a**, Cortico-striatal pop spike amplitude is only statistically significantly decreased at one point in the stimulus intensity range for the *Shank3A*<sup>-/-</sup> mice (red trace) when compared to controls. **b**, **c**, NP1 amplitude (**b**) and PPR (**c**) are not significantly altered between *Shank3A*-mutant and controls. \*  $p < 0.05$ ; Two-way

repeated measures ANOVA ( $p > 0.05$ , not statistically significant), with Bonferroni *post hoc* test for **a** and **b**; two-tailed *t*-test for **c**; all data presented as means  $\pm$  s.e.m; field recordings  $n = 13-14$  from 7 mice per group.

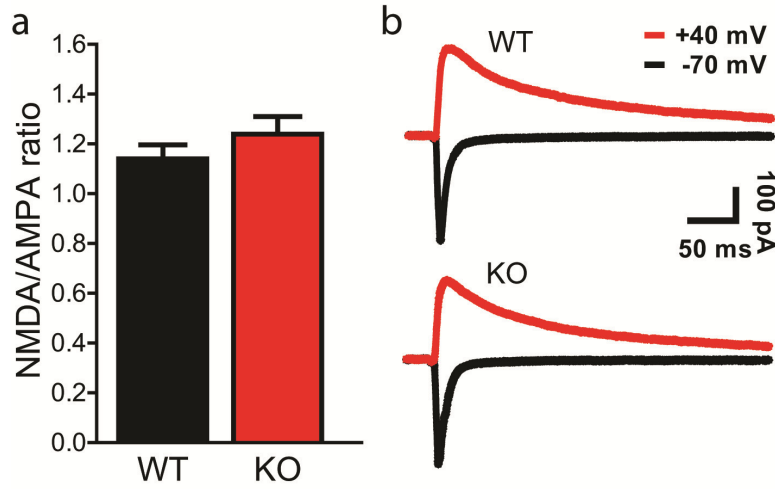

**Supplementary Figure 12 | NMDA/AMPA ratio is not changed in *Shank3B*<sup>-/-</sup> MSNs.** **a**, NMDA/AMPA ratio from MSNs is not changed when comparing *Shank3B*<sup>-/-</sup> to controls. **b**, Example trace recordings from wildtype and *Shank3B*<sup>-/-</sup> MSNs at a stimulus intensity that evokes a ~300pA AMPA mediated response. Two-tailed *t*-test, data are presented as means  $\pm$  s.e.m;  $n = 15$  from wildtype,  $n = 13$  from *Shank3B*<sup>-/-</sup> mice.

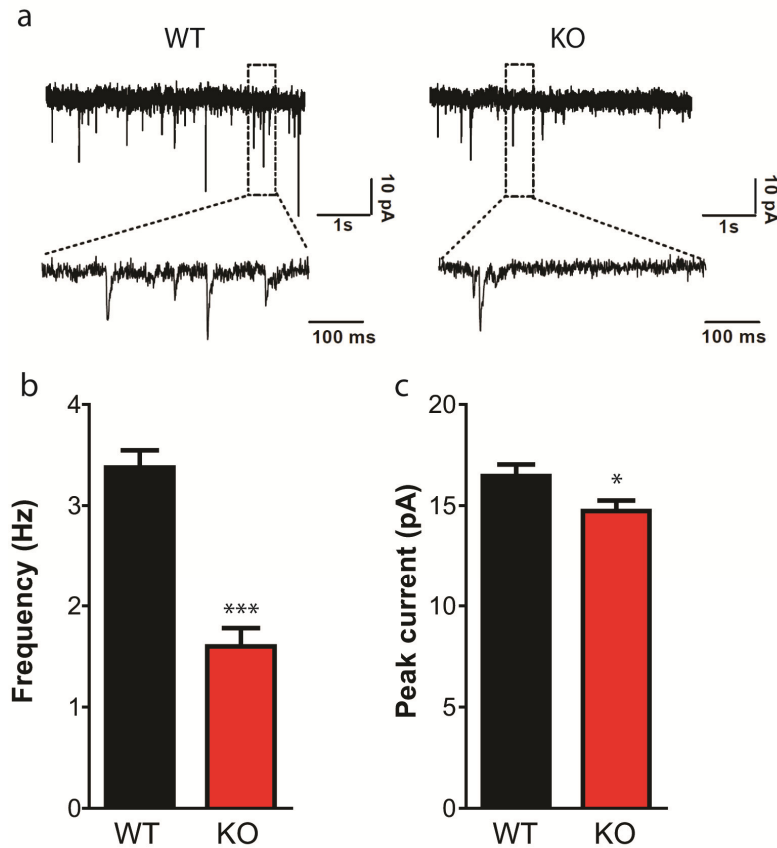

**Supplementary Figure 13 | Reduced synaptic transmission in MSNs of *Shank3B*<sup>-/-</sup> mice from heterozygous matings.** **a**, mEPSC example traces from wildtype and *Shank3B*<sup>-/-</sup> MSNs recorded with whole cell voltage clamp. **b**, mEPSC event frequency in *Shank3B*<sup>-/-</sup> MSNs (red) is lower when compared to



wildtype (black). **c**, Peak current from mEPSC is smaller in *Shank3B*<sup>-/-</sup> than in wildtype MSNs. \* p<0.05, \*\*\* p<0.001; unpaired two-tailed *t*-test; n=15 cells per genotype; all data presented as means ± s.e.m.

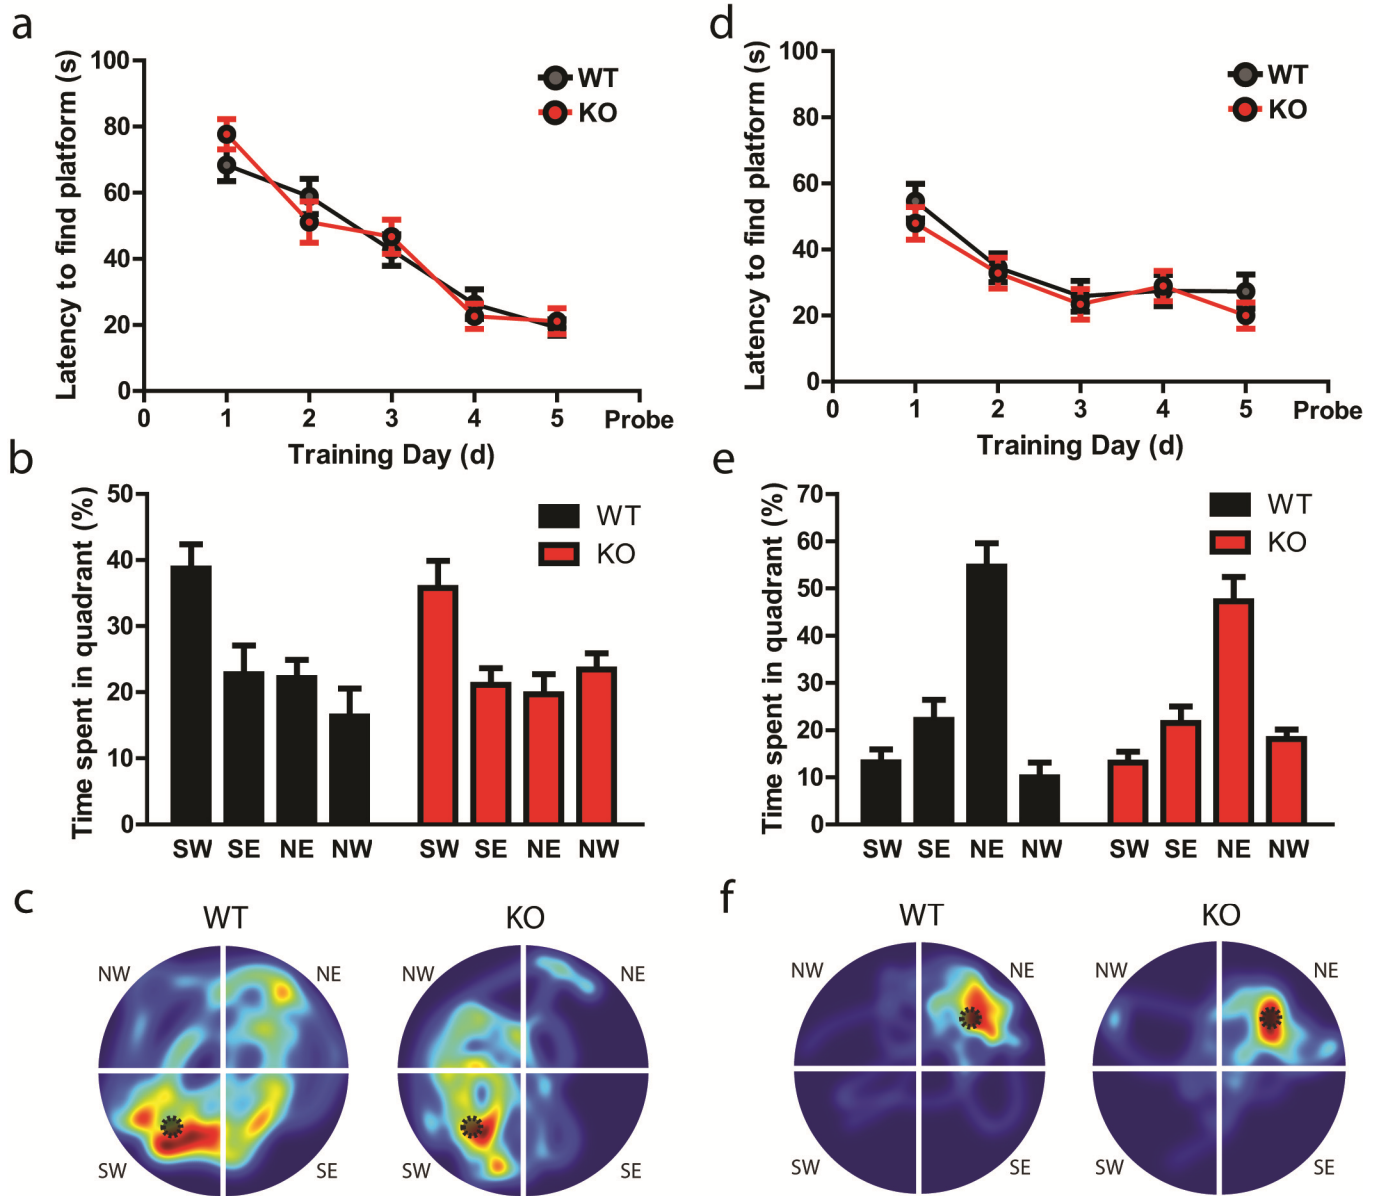

**Supplementary Figure 14 | Morris Water Maze learning and memory test in *Shank3B*<sup>-/-</sup> mice.** **a-b**, Latency to find the platform decreases significantly across 5 days of training for both wildtype and *Shank3B*<sup>-/-</sup> mice (**a**). In the probe trial, when compared to controls, *Shank3B*<sup>-/-</sup> mice spent a similar amount of time in target quadrant (SW) (**b**). **c**, Representative example heat maps from control (WT) and *Shank3B*<sup>-/-</sup> mice (KO) during the probe trial. **d-e**, Latency to find the platform decreases significantly across subsequent 5 days of reversal training (platform switched to NE) for both wildtype and *Shank3B*<sup>-/-</sup> mice (**d**). In the reversal probe trial, when compared to controls, *Shank3B*<sup>-/-</sup> mice spent a similar amount of time in target quadrant (NE) (**e**). **f**, Representative example heat maps from control (WT) and *Shank3B*<sup>-/-</sup> mice (KO) during the reversal probe trial. Two-way repeated measures ANOVA (effect of genotype not statistically significant, p>0.05), all data are presented as means ± s.e.m; n=9 for wildtype, n=8 for *Shank3B*<sup>-/-</sup> mice.

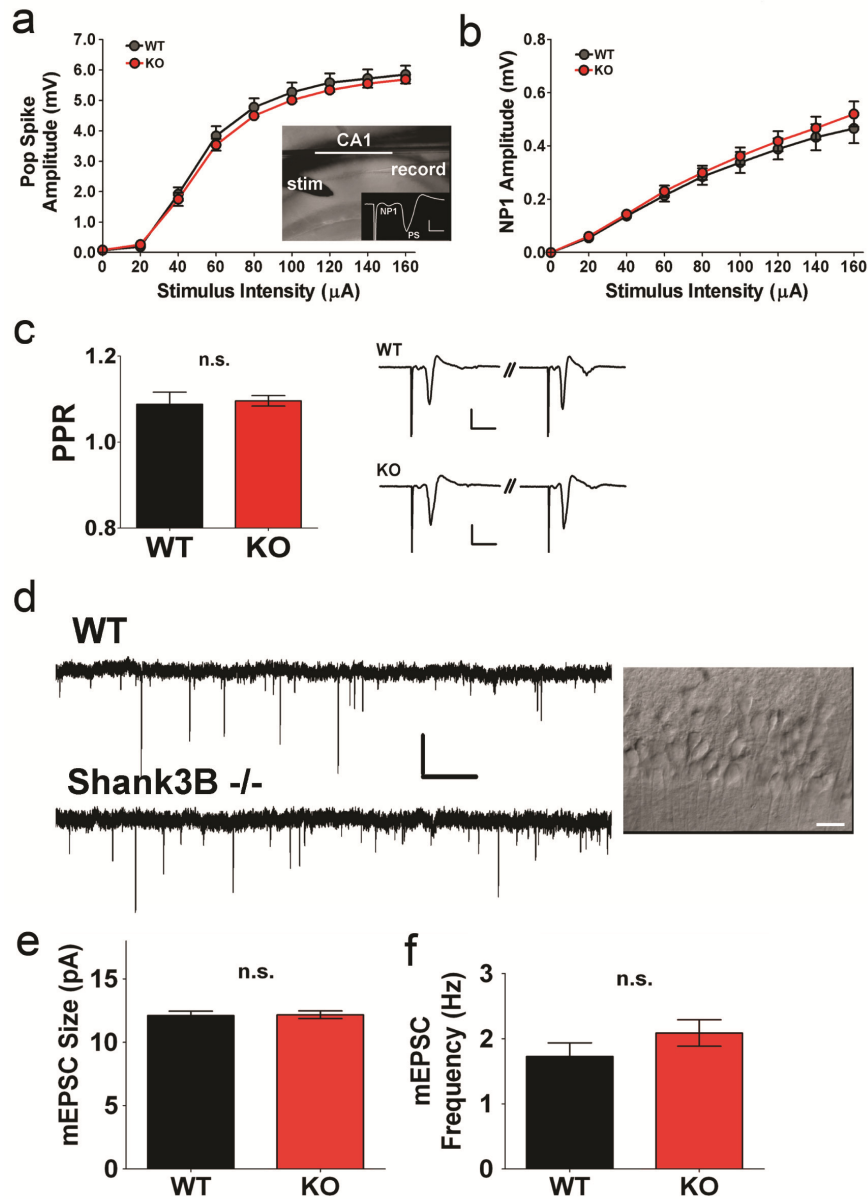

**Supplementary Figure 15 | Hippocampal CA1 pyramidal neuron synaptic function is not significantly altered in *Shank3B*<sup>-/-</sup> mice.** **a**, No significant difference in input-output functions of hippocampal CA1 population spikes measured from acute brain slices from wildtype (WT – black trace) and *Shank3B*<sup>-/-</sup> (KO – red trace) mice. Inset, example DIC image of an acute hippocampal slice showing stimulation electrode and recordings electrode positioning. Lower right, example trace showing fiber volley component (NP1) and population spike (PS). Scale bars, 2 mV/3 msec. **b**, Fiber volley (NP1) amplitude is not significantly different between *Shank3B*<sup>-/-</sup> and WT slices.  $p > 0.05$ , Two-way repeated measures ANOVA, with Bonferroni *post hoc* test. **c**, Summary data for 100 msec interstimulus interval PPR (100 μA stimulus) of CA1 population spikes. Right, example traces of population spike paired pulses. Scale bars: 2 mV / 10 msec PPR is not significantly altered between *Shank3B*<sup>-/-</sup> and WT slices.  $p > 0.05$ , two-tailed *t*-test. Data from **a-c** are presented as means  $\pm$  s.e.m; field recordings  $n = 10$  slices from 4 mice per group. **d**, Example traces of mEPSCs recorded from CA1 pyramidal neurons (WT – top trace, *Shank3B*<sup>-/-</sup> – bottom trace). Scale bars: 20 pA / 2 sec. Right inset, 40X IR-DIC image of a recorded CA1 pyramidal neuron. Scale bar: 20 μm. **e**, Summary data for mEPSC size. **f**, summary data for mEPSC frequency. Whole-cell recordings,  $n = 20$  neurons for WT and  $n = 20$  neurons for *Shank3B*<sup>-/-</sup>. n.s., not significant, two-tailed *t*-test; data are presented as means  $\pm$  s.e.m.

# Supplementary Table 2

## Summary of behavioural statistical data

Shank3B

| Test           | Duration                   | Measurement                         | # of animals | Values                                            | Statistical Test                         | p value                              | Post hoc test                        | p value | Figure               |
|----------------|----------------------------|-------------------------------------|--------------|---------------------------------------------------|------------------------------------------|--------------------------------------|--------------------------------------|---------|----------------------|
| Lesion Score   | -                          | Presence/Absence of skin lesions    | WT=38 KO=29  | WT=0/38<br>KO=10/19                               | Fisher's exact test                      | < 0.0001***                          | -                                    | -       | -                    |
| Grooming Score | 2 hours                    | Time spent grooming (% of total)    | WT=6<br>KO=6 | WT = 16.24 ± 1.252<br>KO = 26.83 ± 1.142          | Unpaired two-tailed t test               | < 0.0001***                          | -                                    | -       | 1d                   |
| Open Field     | 30 minutes (5 minute bins) | Vertical beam-breaks                |              | 5min - WT = 46.78 ± 12.92<br>KO = 8.333 ± 2.646   |                                          |                                      |                                      | < 0.05* | 1e                   |
|                |                            | Vertical beam-breaks                |              | 10min - WT = 35.78 ± 11.12<br>KO = 4.556 ± 1.709  |                                          |                                      |                                      | < 0.05* | 1e                   |
|                |                            | Vertical beam-breaks                |              | 15min - WT = 33.00 ± 9.814<br>KO = 7.667 ± 2.522  | Two-way repeated measure ANOVA           | Genotype < 0.05* Time bin < 0.001*** | Unpaired two-tailed t-test (WT v KO) | < 0.05* | 1e                   |
|                |                            | Vertical beam-breaks                |              | 20 min - WT = 22.33 ± 6.451<br>KO = 5.333 ± 2.147 |                                          |                                      |                                      | < 0.05* | 1e                   |
|                |                            | Vertical beam-breaks                |              | 25 min - WT = 22.89 ± 11.03<br>KO = 3.889 ± 1.679 |                                          |                                      |                                      | > 0.05  | 1e                   |
|                |                            | Vertical beam-breaks                |              | 30 - WT = 18.89 ± 8.448<br>KO = 4.889 ± 2.214     |                                          |                                      |                                      | > 0.05  | 1e                   |
|                |                            | Total distance travelled (m)        |              |                                                   | WT = 29.34 ± 3.552<br>KO = 24.67 ± 3.111 | Unpaired two-tailed t test           | > 0.05                               | -       | -                    |
| Zero Maze      | 5 minutes                  | Thigmotaxis (s)                     |              | WT = 1758 ± 17.22<br>KO = 1770 ± 12.17            | Unpaired two-tailed t test               | > 0.05                               | -                                    | -       | Supplementary Fig.2c |
|                |                            | Time spent in open arm (% of total) |              | WT = 31.46 ± 6.802<br>KO = 14.66 ± 2.740          | Unpaired two-tailed t test               | < 0.05*                              | -                                    | -       | 1f                   |
| Light-Dark box | 5 minutes                  | Duration in Light (s)               |              | WT = 113.8 ± 6.401<br>KO = 107.3 ± 12.72          | Unpaired two-tailed t test               | > 0.05                               | -                                    | -       | Supplementary Fig.2e |
|                |                            | Duration in Dark (s)                |              | WT = 187.3 ± 6.396<br>KO = 193.8 ± 12.69          | Unpaired two-tailed t test               | > 0.05                               | -                                    | -       | Supplementary Fig.2e |
|                |                            | Latency to Light (s)                |              | WT = 9.513 ± 1.494<br>KO = 22.83 ± 4.837          | Unpaired two-tailed t test               | < 0.05*                              | -                                    | -       | Supplementary Fig.2d |

|                    |           |                                                               |                                                                                         |                            |             |                                                                         |                      |
|--------------------|-----------|---------------------------------------------------------------|-----------------------------------------------------------------------------------------|----------------------------|-------------|-------------------------------------------------------------------------|----------------------|
| Social Interaction | 5 minutes | Time in compartment (s)                                       | WT - Stranger 1 = 167 ± 16.65<br>Middle = 59.15 ± 6.77<br>Empty = 73.74 ± 15.27         | One-way ANOVA              | < 0.0001*** | Bonferroni's Multiple Comparison Test (Strg1 v Empty)                   | 2b                   |
|                    |           |                                                               | KO - Stranger 1 = 88.01 ± 18.42<br>Middle = 65.98 ± 7.47<br>Empty = 145.9 ± 16.63       |                            | < 0.01**    |                                                                         | 2b                   |
| Social Novelty     | 5 minutes | Time in compartment (s)                                       | WT - Stranger 1 = 100.3 ± 16.85<br>Middle = 42.83 ± 4.765<br>Stranger 2 = 156.7 ± 15.51 | One-way ANOVA              | < 0.01**    | Bonferroni's Multiple Comparison Test (Strg1 v Strg 2)                  | 2c                   |
|                    |           |                                                               | KO - Stranger 1 = 96.8 ± 23.15<br>Middle = 88 ± 19.8<br>Stranger 2 = 115 ± 22.49        |                            | > 0.05      |                                                                         | 2c                   |
| Social Interaction | 5 minutes | Time spent in close proximity (s)                             | Stranger 1 - WT = 132.7 ± 15.46<br>KO = 62.06 ± 11.72                                   | One-way ANOVA              | < 0.0001*** | Bonferroni's Multiple Comparison Test (Strg 1 v Strg 1) (Empty v Empty) | 2d                   |
|                    |           |                                                               | Empty Cage WT = 47.95 ± 8.743<br>KO = 100.5 ± 14.53                                     |                            | < 0.05*     |                                                                         | 2d                   |
| Social Novelty     | 5 minutes | Time spent in close proximity (s)                             | Stranger 1 - WT = 60.39 ± 12.27<br>KO = 35.59 ± 11.43                                   | One-way ANOVA              | > 0.05      | Bonferroni's Multiple Comparison Test (Strg1 v Strg 1) (Strg2 v Strg 2) | 2e                   |
|                    |           |                                                               | Stranger 2 - WT = 83.21 ± 16.46<br>KO = 40.68 ± 10.52                                   |                            | < 0.05*     |                                                                         | 2e                   |
|                    |           | Time spent in reciprocal social interaction (s)               | WT = 87.28 ± 11.02<br>KO = 31.30 ± 4.389                                                | Unpaired two-tailed t test | < 0.01**    |                                                                         | Supplementary Fig.5a |
| Dyadic Test        | 5 minutes | Frequency of nose-to-nose sniffing                            | WT = 5<br>KO = 5                                                                        | Unpaired two-tailed t test | < 0.05*     |                                                                         | Supplementary Fig.5b |
|                    |           | Frequency of anogenital sniffing initiated by the test animal | WT = 10.20 ± 1.53<br>KO = 1.80 ± 0.8                                                    | Unpaired two-tailed t test | < 0.01**    |                                                                         | Supplementary Fig.5c |

|                                         |                                          |                                                                                                                                                                                                                                                                          |                                                                                                                                                                                                                                                   |                                |                                                                 |                                                                         |                         |
|-----------------------------------------|------------------------------------------|--------------------------------------------------------------------------------------------------------------------------------------------------------------------------------------------------------------------------------------------------------------------------|---------------------------------------------------------------------------------------------------------------------------------------------------------------------------------------------------------------------------------------------------|--------------------------------|-----------------------------------------------------------------|-------------------------------------------------------------------------|-------------------------|
| Social Interaction<br>(Cross Fostering) | 5 minutes                                | Time in compartment (s)                                                                                                                                                                                                                                                  | <p>WT - Stranger 1 = 183.3 ± 19.61<br/>Middle = 38.24 ± 5.38<br/>Empty = 76.31 ± 15.86</p> <p>KO - Stranger 1 = 40.00 ± 14.50<br/>Middle = 73.29 ± 29.01<br/>Empty = 186.6 ± 36.07</p>                                                            | One-way ANOVA                  | < 0.01**                                                        | Bonferroni's Multiple Comparison Test (Strg1 v Empty)                   | Supplementary Figure 6a |
| Social Novelty<br>(Cross Fostering)     | 5 minutes                                | Time in compartment (s)                                                                                                                                                                                                                                                  | <p>WT - Stranger 1 = 93.06 ± 17.81<br/>Middle = 30.32 ± 6.31<br/>Stranger 2 = 176.40 ± 19.19</p> <p>KO - Stranger 1 = 111.7 ± 26.69<br/>Middle = 64.45 ± 9.59<br/>Stranger 2 = 123.8 ± 33.20</p>                                                  | One-way ANOVA                  | < 0.001***                                                      | Bonferroni's Multiple Comparison Test (Strg1 v Strg 2)                  | Supplementary Figure 6b |
| Social Interaction<br>(Cross Fostering) | 5 minutes                                | Time spent in close proximity (s)                                                                                                                                                                                                                                        | <p>Stranger 1 - WT = 145.4 ± 23.84<br/>KO = 11.70 ± 6.53</p> <p>Empty Cage WT = 38.20 ± 9.11<br/>KO = 93.67 ± 21.75</p>                                                                                                                           | One-way ANOVA                  | < 0.0001***                                                     | Bonferroni's Multiple Comparison Test (Strg 1 v Strg 1) (Empty v Empty) | Supplementary Figure 6c |
| Social Novelty<br>(Cross Fostering)     | 5 minutes                                | Time spent in close proximity (s)                                                                                                                                                                                                                                        | <p>Stranger 1 - WT = 47.23 ± 11.50<br/>KO = 38.40 ± 15.43</p> <p>Stranger 2 - WT = 100.3 ± 24.77<br/>KO = 18.32 ± 5.59</p>                                                                                                                        | One-way ANOVA                  | < 0.05*                                                         | Bonferroni's Multiple Comparison Test (Strg1 v Strg 1) (Strg2 v Strg 2) | Supplementary Figure 6d |
| Morris Water Maze - Training            | Maximum duration of 90 seconds per trial | <p>Latency to Platform (Day 1; 4 trials per day)</p> <p>Latency to Platform (Day 2; 4 trials per day)</p> <p>Latency to Platform (Day 3; 4 trials per day)</p> <p>Latency to Platform (Day 4; 4 trials per day)</p> <p>Latency to Platform (Day 5; 4 trials per day)</p> | <p>WT = 65.07 ± 5.314<br/>KO = 77.69 ± 4.598</p> <p>WT = 58.85 ± 5.339<br/>KO = 51.11 ± 6.253</p> <p>WT = 42.65 ± 4.795<br/>KO = 46.7 ± 5.143</p> <p>WT = 26.3 ± 4.49<br/>KO = 22.66 ± 3.825</p> <p>WT = 19.22 ± 2.492<br/>KO = 21.12 ± 3.885</p> | Two-way repeated measure ANOVA | Effect of Training p < 0.0001***<br>Effect of Genotype p > 0.05 | Bonferroni's Multiple Comparison Test (WT v KO)                         | Supplementary 14a       |

|                                             |                                                   |                                                  |                                           |                                                                    |                                                          |        |                         |
|---------------------------------------------|---------------------------------------------------|--------------------------------------------------|-------------------------------------------|--------------------------------------------------------------------|----------------------------------------------------------|--------|-------------------------|
| Morris Water Maze -<br>Reversal Training    | Maximum<br>duration of 90<br>seconds per<br>trial | Latency to Platform<br>(Day 1; 4 trials per day) | WT = 54.62 ± 5.228<br>KO = 47.95 ± 4.954  |                                                                    | > 0.05                                                   |        |                         |
|                                             |                                                   | Latency to Platform<br>(Day 2; 4 trials per day) | WT = 34.52 ± 4.376<br>KO = 32.87 ± 4.662  |                                                                    | > 0.05                                                   |        |                         |
|                                             |                                                   | Latency to Platform<br>(Day 3; 4 trials per day) | WT = 25.85 ± 4.683<br>KO = 23.43 ± 4.614  | Effect of Training p <<br>0.0001*** Effect of<br>Genotype p > 0.05 | Bonferroni's<br>Multiple<br>Comparison Test<br>(WT v KO) | > 0.05 | Supplementary<br>14b    |
|                                             |                                                   | Latency to Platform<br>(Day 4; 4 trials per day) | WT = 27.56 ± 4.697<br>KO = 28.96 ± 4.588  |                                                                    |                                                          | > 0.05 |                         |
|                                             |                                                   | Latency to Platform<br>(Day 5; 4 trials per day) | WT = 27.3 ± 5.131<br>KO = 20 ± 3.959      |                                                                    |                                                          | > 0.05 |                         |
| Morris Water Maze -<br>Probe Trial          | 60 seconds                                        | Percent of Time in SW Quadrant                   | WT = 38.74 ± 3.65<br>KO = 35.76 ± 4.119   |                                                                    | > 0.05                                                   |        |                         |
|                                             |                                                   | Percent of Time in SE Quadrant                   | WT = 22.71 ± 4.364<br>KO = 21.12 ± 2.515  | Effect of Quadrant p <<br>0.001*** Effect of<br>Genotype p > 0.05  | Bonferroni's<br>Multiple<br>Comparison Test<br>(WT v KO) | > 0.05 | Supplementary<br>14c    |
|                                             |                                                   | Percent of Time in NE Quadrant                   | WT = 22.16 ± 2.733<br>KO = 19.69 ± 3.022  |                                                                    |                                                          | > 0.05 |                         |
|                                             |                                                   | Percent of Time in NW Quadrant                   | WT = 16.37 ± 2.733<br>KO = 19.69 ± 3.022  |                                                                    |                                                          | > 0.05 |                         |
| Morris Water Maze -<br>Reversal Probe Trial | 60 seconds                                        | Percent of Time in SW Quadrant                   | WT = 13.17 ± 2.732<br>KO = 13.08 ± 2.334  |                                                                    | > 0.05                                                   |        |                         |
|                                             |                                                   | Percent of Time in SE Quadrant                   | WT = 22.16 ± 4.225<br>KO = 21.52 ± 3.483  | Effect of Training p <<br>0.0001*** Effect of<br>Genotype p > 0.05 | Bonferroni's<br>Multiple<br>Comparison Test<br>(WT v KO) | > 0.05 | Supplementary<br>14d    |
|                                             |                                                   | Percent of Time in NE Quadrant                   | WT = 54.65 ± 4.897<br>KO = 47.3 ± 5.13    |                                                                    |                                                          | > 0.05 |                         |
|                                             |                                                   | Percent of Time in NW Quadrant                   | WT = 10.01 ± 3.081<br>KO = 18.09 ± 2.024  |                                                                    |                                                          | > 0.05 |                         |
| Rotorod                                     | Trial 1 of<br>MWM                                 | Latency to fall (s)                              | WT = 116.8 ± 13.92<br>KO = 111.8 ± 18.59  |                                                                    | > 0.05                                                   |        |                         |
|                                             |                                                   | Latency to fall (s)                              | WT = 117.4 ± 11.86<br>KO = 120 ± 28.6     | Effect of Trial p < 0.05*<br>Effect of Genotype p ><br>0.05        | Bonferroni's<br>Multiple<br>Comparison Test<br>(WT v KO) | > 0.05 | Supplementary<br>Fig 2a |
|                                             |                                                   | Latency to fall (s)                              | WT = 139.4 ± 10.51<br>KO = 141 ± 16.83    |                                                                    |                                                          | > 0.05 |                         |
| Swim Speed                                  | Trial 1 of<br>MWM                                 | Velocity (cm/s)                                  | WT = 17.94 ± 0.8249<br>KO = 18.47 ± 1.268 | Unpaired two-tailed t<br>test                                      | > 0.05                                                   | -      |                         |

# Shank3A

| Test               | Duration                   | Measurement                         | # of animals     | Values                                                                                  | Statistical Test               | p           | Post hoc test                                           | p           | Figure           |   |
|--------------------|----------------------------|-------------------------------------|------------------|-----------------------------------------------------------------------------------------|--------------------------------|-------------|---------------------------------------------------------|-------------|------------------|---|
| Open Field         | 30 minutes (5 minute bins) | Vertical beam-breaks                | WT = 8<br>KO = 8 | 5min - WT = 33.44 ± 7.627<br>KO = 40.56 ± 4.187                                         | Two-way repeated measure ANOVA | > 0.05      | Unpaired two-tailed t-test (WT v KO)                    | > 0.05      | Supplementary 3a |   |
|                    |                            |                                     |                  | 10min - WT = 22.33 ± 3.603<br>KO = 32.11 ± 5.16                                         |                                |             |                                                         |             |                  |   |
|                    | 30 minutes                 | Total distance travelled (m)        | WT = 8<br>KO = 8 | 15min - WT = 22.67 ± 3.403<br>KO = 24.11 ± 3.486                                        | Unpaired two-tailed t-test     | > 0.05      | -                                                       | -           |                  | - |
|                    |                            |                                     |                  | 20min - WT = 24.11 ± 3.506<br>KO = 17.33 ± 4.282                                        |                                |             |                                                         |             |                  |   |
|                    |                            |                                     |                  | 25min - WT = 30.44 ± 5.409<br>KO = 21.22 ± 2.093                                        |                                |             |                                                         |             |                  |   |
|                    |                            |                                     |                  | 30min - WT = 30.33 ± 5.6<br>KO = 24.78 ± 5.23                                           |                                |             |                                                         |             |                  |   |
| Zero Maze          | 5 minutes                  | Time spent in open arm (% of total) | WT = 8<br>KO = 8 | WT = 45.62 ± 3.459<br>KO = 48.82 ± 3.02                                                 | Unpaired two-tailed t-test     | > 0.05      | -                                                       | -           | Supplementary 3b |   |
|                    |                            |                                     |                  | WT = 1673 ± 23.58<br>KO = 1676 ± 23.6                                                   |                                |             |                                                         |             |                  |   |
| Social Interaction | 5 minutes                  | Time in compartment                 | WT = 8<br>KO = 8 | WT - Stranger 1 = 172 ± 13.72<br>Middle = 41.12 ± 3.781<br>Empty = 86.32 ± 12.43        | One-way ANOVA                  | < 0.0001*** | Bonferroni's Multiple Comparison Test (Strg 1 v Empty)  | < 0.0001*** | Supplementary 4b |   |
|                    |                            |                                     |                  | KO - Stranger 1 = 151 ± 10.73<br>Middle 55.69 ± 5.847<br>Empty = 93 ± 8.178             |                                |             |                                                         |             |                  |   |
| Social Novelty     | 5 minutes                  | Time in compartment                 | WT=12 KO=13      | WT - Stranger 1 = 104.5 ± 13.57<br>Middle 31.7 ± 4.527<br>Stranger 2 = 163.6 ± 17.31    | One-way ANOVA                  | < 0.0001*** | Bonferroni's Multiple Comparison Test (Strg 1 v Strg 2) | < 0.05*     | Supplementary 4c |   |
|                    |                            |                                     |                  | KO - Stranger 1 = 120.6 ± 15.79<br>Middle = 46.36 ± 7.503<br>Stranger 2 = 132.7 ± 20.03 |                                |             |                                                         |             |                  |   |

|                    |           |                               |                                                                                                                                            |               |             |                                                         |                   |                  |
|--------------------|-----------|-------------------------------|--------------------------------------------------------------------------------------------------------------------------------------------|---------------|-------------|---------------------------------------------------------|-------------------|------------------|
| Social Interaction | 5 minutes | Time Spent in close proximity | <p>WT - Stranger 1 = 133.8 ± 14.52<br/>Empty = 52.77 ± 8.891</p> <p>KO - Stranger 1 = 105.6 ± 10.97<br/>Empty = 52.52 ± 4.811</p>          | One-way ANOVA | < 0.0001*** | Bonferroni's Multiple Comparison Test (Strg 1 v Empty)  | < 0.0001***       | Supplementary 4d |
| Social Novelty     | 5 minutes | Time Spent in close proximity | <p>WT - Stranger 1 = 54.25 ± 11.22<br/>Stranger 2 = 105.9 ± 18.4</p> <p>KO - Stranger 1 = 48.39 ± 8.624<br/>Stranger 2 = 70.87 ± 13.83</p> | One-way ANOVA | < 0.05*     | Bonferroni's Multiple Comparison Test (Strg 1 v Strg 2) | < 0.05*<br>> 0.05 | Supplementary 4e |
